# Supplementary material for: Tracing the rhythms of repetitive sequences: Mixed modes of satellite DNA and transposable element evolution in the air-breathing catfish (Clarias)
Source: Research Square preprint supplement (doi:10.21203/rs.3.rs-8297195/v1), 2025-12-19
Supplement: Supplementary file 2 [file c09815a9d71a70a87a43a82b.docx]

**Supplementary Information**

**Supplementary Figure 1.** Density maps of satellite DNAs and TEs in the chromosome-level genomes of *Clarias*. Lines show examples of homeologous chromosomes. Green lines indicate collinear scaffold placing, red lines indicate inverted scaffold placing.

**Supplementary Figure 2.** Density maps of microsatellites in the chromosome-level genomes of *Clarias*. Lines show examples of homeologous chromosomes. Green lines indicate collinear scaffold placing, red lines indicate inverted scaffold placing.

**Supplementary Table 1.** Satellite DNA elements and their family distribution in the studied *Clarias* genomes

**Supplementary Table 2.** Satellite DNA abundances and family distributions in the genomes of *Clarias macrocephalus, C. gariepinus, C. fuscus* and *C. dussumieri.*
