# Supplementary material for: Tracing the rhythms of repetitive sequences: Mixed modes of satellite DNA and transposable element evolution in the air-breathing catfish (Clarias)
Source: Research Square preprint supplement (doi:10.21203/rs.3.rs-8297195/v1), 2025-12-19
Supplement: Supplementary file 3 [file e456609821fca8c6fae4e790.docx]

| Supplementary Table 1. Satellite DNA elements and their family distribution in the studied *Clarias* genomes | | | | | | | | | | | |
| --- | --- | --- | --- | --- | --- | --- | --- | --- | --- | --- | --- |
| **SatDNA family** | **SatDNA elements** | | | | | | | | | | |
| Cla-Sat-215 | Cma-Sat1-216 | Cma-Sat36-892 | Cga-Sat1-204 | Cfu-Sat1-216 | Cdu-Sat1-220 |  |  |  |  |  |  | |
| Cla-Sat-225 | Cma-Sat2-225 | Cfu-Sat7-226 | Cga-Sat2-226 | Cdu-Sat3-277 | Cma-Sat18-216 | Cga-Sat24-250 |  |  |  |  |  | |
| Cla-Sat-149 | Cma-Sat3-176 |  |  |  |  |  |  |  |  |  |  | |
| Cla-Sat-Fam4 | Cma-Sat5-1903 | Cfu-Sat16-1835 | Cga-Sat8-1924 |  |  |  |  |  |  |  |  | |
| Cla-Sat-Fam5 | Cma-Sat6-2468 | Cfu-Sat22-2637 | Cfu-Sat5-2498 | Cdu-Sat4-1277 |  |  |  |  |  |  |  | |
| Cla-Sat-Fam6 | Cma-Sat7-876 | Cfu-Sat6-895 | Cga-Sat25-935 |  |  |  |  |  |  |  |  | |
| Cla-Sat-Fam7 | Cma-Sat8-1351 | Cga-Sat10-866 | Cfu-Sat4-1327 |  |  |  |  |  |  |  |  | |
| Cla-Sat-Fam8 | Cma-Sat9-2391 | Cma-Sat25-2391 | Cga-Sat43-2112 | Cfu-Sat19-1689 | Cga-Sat13-1780 |  |  |  |  |  |  | |
| Cla-Sat-Fam9 | Cma-Sat10-1355 | Cfu-Sat27-1112 | Cga-Sat43-2112 |  |  |  |  |  |  |  |  | |
| Cla-Sat-Fam10 | Cma-Sat11-1560 | Cga-Sat17-1595 | Cfu-Sat29-998 |  |  |  |  |  |  |  |  | |
| Cla-Sat-Fam11 | Cma-Sat12-1034 | Cfu-Sat8-1035 | Cma-Sat26-931 | Cfu-Sat12-1434 | Cga-Sat35-759 | Cga-Sat7-972 | Cga-Sat44-1162 | Cga-Sat6-873 | Cma-Sat30-1484 | Cfu-Sat13-895 | Cga-Sat23-1202 | |
| Cla-Sat-Fam12 | Cma-Sat13-2743 | Cga-Sat3-2818 | Cfu-Sat2-2822 | Cga-Sat39-2825 | Cma-Sat19-2558 | Cga-Sat4-2539 | Cdu-Sat6-2585 |  |  |  |  | |
| Cla-Sat-Fam13 | Cma-Sat14-1499 | Cga-Sat21-1655 | Cfu-Sat17-1701 |  |  |  |  |  |  |  |  | |
| Cla-Sat-Fam14 | Cma-Sat15-587 | Cga-Sat20-538 |  |  |  |  |  |  |  |  |  | |
| Cla-Sat-Fam15 | Cma-Sat16-1223 | Cga-Sat16-1238 | Cfu-Sat26-993 |  |  |  |  |  |  |  |  | |
| Cla-Sat-Fam16 | Cma-Sat17-929 | Cfu-Sat35-916 | Cga-Sat46-637 |  |  |  |  |  |  |  |  | |
| **SatDNA family** | **SatDNA elements** | | | | | | | | | | | |
| Cla-Sat-Fam17 | Cma-Sat20-1710 |  |  |  |  |  |  |  |  |  |  | |
| Cla-Sat-Fam18 | Cma-Sat21-1455 | Cfu-Sat25-1219 | Cga-Sat41-1384 |  |  |  |  |  |  |  |  | |
| Cla-Sat-Fam19 | Cma-Sat22-511 | Cfu-Sat11-974 | Cga-Sat26-1011 |  |  |  |  |  |  |  |  | |
| Cla-Sat-Fam20 | Cma-Sat23-945 | Cfu-Sat33-949 | Cga-Sat12-1018 |  |  |  |  |  |  |  |  | |
| Cla-Sat-Fam21 | Cma-Sat24-1053 | Cga-Sat11-1224 |  |  |  |  |  |  |  |  |  | |
| Cla-Sat-Fam22 | Cma-Sat27-754 | Cfu-Sat14-695 | Cga-Sat27-694 |  |  |  |  |  |  |  |  | |
| Cla-Sat-Fam23 | Cma-Sat28-948 | Cfu-Sat10-1067 | Cga-Sat19-931 |  |  |  |  |  |  |  |  | |
| Cla-Sat-Fam24 | Cma-Sat29-1244 | Cga-Sat42-1106 |  |  |  |  |  |  |  |  |  | |
| Cla-Sat-Fam25 | Cma-Sat31-1233 | Cfu-Sat32-930 | Cga-Sat14-1217 |  |  |  |  |  |  |  |  | |
| Cla-Sat-Fam26 | Cma-Sat32-1361 | Cga-Sat38-1361 |  |  |  |  |  |  |  |  |  | |
| Cla-Sat-Fam27 | Cma-Sat33-337 | Cga-Sat30-792 |  |  |  |  |  |  |  |  |  | |
| Cla-Sat-Fam28 | Cma-Sat34-1849 | Cfu-Sat31-1460 |  |  |  |  |  |  |  |  |  | |
| Cla-Sat-Fam29 | Cma-Sat35-182 |  |  |  |  |  |  |  |  |  |  | |
| Cla-Sat-Fam30 | Cma-Sat37-1356 | Cfu-Sat28-1359 | Cga-Sat32-1301 |  |  |  |  |  |  |  |  | |
| Cla-Sat-Fam31 | Cma-Sat38-1060 | Cfu-Sat18-859 |  |  |  |  |  |  |  |  |  | |
| Cla-Sat-Fam32 | Cga-Sat5-960 |  |  |  |  |  |  |  |  |  |  | |
| **SatDNA family** | **SatDNA elements** | | | | | | | | | | | |
| Cla-Sat-Fam33 | Cga-Sat15-625 |  |  |  |  |  |  |  |  |  |  | |
| Cla-Sat-Fam34 | Cga-Sat22-206 |  |  |  |  |  |  |  |  |  |  | |
| Cla-Sat-Fam35 | Cga-Sat28-1528 |  |  |  |  |  |  |  |  |  |  | |
| Cla-Sat-Fam36 | Cga-Sat31-1725 |  |  |  |  |  |  |  |  |  |  | |
| Cla-Sat-Fam37 | Cga-Sat33-46 |  |  |  |  |  |  |  |  |  |  | |
| Cla-Sat-Fam38 | Cga-Sat34-1037 |  |  |  |  |  |  |  |  |  |  | |
| Cla-Sat-Fam39 | Cga-Sat36-139 |  |  |  |  |  |  |  |  |  |  | |
| Cla-Sat-Fam40 | Cga-Sat37-10 |  |  |  |  |  |  |  |  |  |  | |
| Cla-Sat-Fam41 | Cga-Sat45-639 | Cfu-Sat21-467 |  |  |  |  |  |  |  |  |  | |
| Cla-Sat-Fam42 | Cga-Sat47-62 |  |  |  |  |  |  |  |  |  |  | |
| Cla-Sat-Fam43 | Cfu-Sat3-785 |  |  |  |  |  |  |  |  |  |  | |
| Cla-Sat-Fam44 | Cfu-Sat15-2319 |  |  |  |  |  |  |  |  |  |  | |
| Cla-Sat-Fam45 | Cfu-Sat20-36 |  |  |  |  |  |  |  |  |  |  | |
| Cla-Sat-Fam46 | Cfu-Sat23-890 |  |  |  |  |  |  |  |  |  |  | |
| Cla-Sat-Fam47 | Cfu-Sat24-219 |  |  |  |  |  |  |  |  |  |  | |
| Cla-Sat-Fam48 | Cfu-Sat30-228 | Cga-Sat29-233 |  |  |  |  |  |  |  |  |  | |
| Cla-Sat-Fam49 | Cfu-Sat34-39 |  |  |  |  |  |  |  |  |  |  | |
| Cla-Sat-Fam50 | Cdu-Sat5-15 |  |  |  |  |  |  |  |  |  |  | |
| Cla-Sat-Fam51 | Cga-Sat40-1920 |  |  |  |  |  |  |  |  |  |  | |

Supplementary Table 2. Satellite DNA abundances and family distributions in the genomes of *Clarias macrocephalus, C. gariepinus, C. fuscus* and *C. dussumieri.*

| **Species** | **Name** | **Monomer length** | **Abundance** |
| --- | --- | --- | --- |
| ***C. macrocephalus*** | Cma-Sat1-216 | 216 | 0.4123% |
|  | Cma-Sat2-225 | 225 | 0.1935% |
|  | Cma-Sat3-176 | 176 | 0.1097% |
|  | Cma-Sat5-1903 | 1903 | 0.0376% |
|  | Cma-Sat6-2468 | 2468 | 0.0340% |
|  | Cma-Sat7-876 | 876 | 0.0306% |
|  | Cma-Sat8-1351 | 1351 | 0.0257% |
|  | Cma-Sat9-2391 | 2391 | 0.0231% |
|  | Cma-Sat10-1355 | 1355 | 0.0226% |
|  | Cma-Sat11-1560 | 1560 | 0.0213% |
|  | Cma-Sat12-1034 | 1034 | 0.0195% |
|  | Cma-Sat13-2743 | 2743 | 0.0177% |
|  | Cma-Sat14-1499 | 1499 | 0.0176% |
|  | Cma-Sat15-587 | 587 | 0.0158% |
|  | Cma-Sat16-1223 | 1223 | 0.0148% |
|  | Cma-Sat17-929 | 929 | 0.0147% |
|  | Cma-Sat18-216 | 216 | 0.0142% |
|  | Cma-Sat19-2558 | 2558 | 0.0140% |
|  | Cma-Sat20-1710 | 1710 | 0.0139% |
|  | Cma-Sat21-1455 | 1455 | 0.0137% |
|  | Cma-Sat22-511 | 511 | 0.0136% |
|  | Cma-Sat23-945 | 945 | 0.0133% |
|  | Cma-Sat24-1053 | 1053 | 0.0123% |
|  | Cma-Sat25-2391 | 2391 | 0.0109% |
|  | Cma-Sat26-931 | 931 | 0.0105% |
|  | Cma-Sat27-754 | 754 | 0.0098% |
|  | Cma-Sat28-948 | 948 | 0.0096% |
| ***C. macrocephalus*** | Cma-Sat29-1244 | 1244 | 0.0096% |
|  | Cma-Sat30-1484 | 1484 | 0.0090% |
|  | Cma-Sat31-1233 | 1233 | 0.0089% |
|  | Cma-Sat32-1361 | 1361 | 0.0082% |
|  | Cma-Sat33-337 | 337 | 0.0081% |
|  | Cma-Sat34-1849 | 1849 | 0.0079% |
|  | Cma-Sat35-182 | 182 | 0.0078% |
|  | Cma-Sat36-892 | 892 | 0.0074% |
|  | Cma-Sat37-1356 | 1356 | 0.0065% |
|  | Cma-Sat38-1060 | 1060 | 0.0063% |
| ***C. gariepinus*** | Cga-Sat1-204 | 204 | 0.5599% |
|  | Cga-Sat2-226 | 226 | 0.4613% |
|  | Cga-Sat3-2818 | 2818 | 0.0772% |
|  | Cga-Sat4-2539 | 2539 | 0.0760% |
|  | Cga-Sat5-960 | 960 | 0.0680% |
|  | Cga-Sat6-873 | 873 | 0.0557% |
|  | Cga-Sat7-972 | 972 | 0.0379% |
|  | Cga-Sat8-1924 | 1924 | 0.0303% |
|  | Cga-Sat10-866 | 866 | 0.0260% |
|  | Cga-Sat11-1224 | 1224 | 0.0250% |
|  | Cga-Sat12-1018 | 1018 | 0.0205% |
|  | Cga-Sat13-1780 | 1780 | 0.0198% |
|  | Cga-Sat14-1217 | 1217 | 0.0185% |
|  | Cga-Sat15-625 | 625 | 0.0182% |
|  | Cga-Sat16-1238 | 1238 | 0.0173% |
|  | Cga-Sat17-1595 | 1595 | 0.0171% |
|  | Cga-Sat19-931 | 931 | 0.0160% |
|  | Cga-Sat20-538 | 538 | 0.0158% |
|  | Cga-Sat21-1655 | 1655 | 0.0152% |
|  | Cga-Sat22-206 | 206 | 0.0136% |
|  | Cga-Sat23-1202 | 1202 | 0.0130% |
| ***C. gariepinus*** | Cga-Sat24-250 | 250 | 0.0129% |
|  | Cga-Sat25-935 | 935 | 0.0126% |
|  | Cga-Sat26-1011 | 1011 | 0.0123% |
|  | Cga-Sat27-694 | 694 | 0.0118% |
|  | Cga-Sat28-1528 | 1528 | 0.0113% |
|  | Cga-Sat29-233 | 233 | 0.0110% |
|  | Cga-Sat30-792 | 792 | 0.0105% |
|  | Cga-Sat31-1725 | 1725 | 0.0104% |
|  | Cga-Sat32-1301 | 1301 | 0.0098% |
|  | Cga-Sat33-46 | 46 | 0.0087% |
|  | Cga-Sat34-1037 | 1037 | 0.0084% |
|  | Cga-Sat35-759 | 759 | 0.0083% |
|  | Cga-Sat36-139 | 139 | 0.0083% |
|  | Cga-Sat37-10 | 10 | 0.0080% |
|  | Cga-Sat38-1361 | 1361 | 0.0073% |
|  | Cga-Sat39-2825 | 2825 | 0.0069% |
|  | Cga-Sat40-1920 | 1920 | 0.0066% |
|  | Cga-Sat41-1384 | 1384 | 0.0066% |
|  | Cga-Sat42-1106 | 1106 | 0.0064% |
|  | Cga-Sat43-2112 | 2112 | 0.0062% |
|  | Cga-Sat44-1162 | 1162 | 0.0060% |
|  | Cga-Sat45-639 | 639 | 0.0058% |
|  | Cga-Sat46-637 | 637 | 0.0058% |
|  | Cga-Sat47-62 | 62 | 0.0055% |
| ***C. fuscus*** | Cfu-Sat1-216 | 216 | 0.3447% |
|  | Cfu-Sat2-2822 | 2822 | 0.2294% |
|  | Cfu-Sat3-785 | 785 | 0.0663% |
|  | Cfu-Sat4-1327 | 1327 | 0.0488% |
|  | Cfu-Sat5-2498 | 2498 | 0.0431% |
|  | Cfu-Sat6-895 | 895 | 0.0428% |
| ***C. fuscus*** | Cfu-Sat7-226 | 226 | 0.0410% |
|  | Cfu-Sat8-1035 | 1035 | 0.0408% |
|  | Cfu-Sat10-1067 | 1067 | 0.0309% |
|  | Cfu-Sat11-974 | 974 | 0.0303% |
|  | Cfu-Sat12-1434 | 1434 | 0.0287% |
|  | Cfu-Sat13-895 | 895 | 0.0264% |
|  | Cfu-Sat14-695 | 695 | 0.0259% |
|  | Cfu-Sat15-2319 | 2319 | 0.0254% |
|  | Cfu-Sat16-1835 | 1835 | 0.0233% |
|  | Cfu-Sat17-1701 | 1701 | 0.0213% |
|  | Cfu-Sat18-859 | 859 | 0.0179% |
|  | Cfu-Sat19-1689 | 1689 | 0.0176% |
|  | Cfu-Sat20-36 | 36 | 0.0174% |
|  | Cfu-Sat21-467 | 467 | 0.0170% |
|  | Cfu-Sat22-2637 | 2637 | 0.0169% |
|  | Cfu-Sat23-890 | 890 | 0.0164% |
|  | Cfu-Sat24-219 | 219 | 0.0147% |
|  | Cfu-Sat25-1219 | 1219 | 0.0130% |
|  | Cfu-Sat26-993 | 993 | 0.0125% |
|  | Cfu-Sat27-1112 | 1112 | 0.0104% |
|  | Cfu-Sat28-1359 | 1359 | 0.0092% |
|  | Cfu-Sat29-998 | 998 | 0.0086% |
|  | Cfu-Sat30-228 | 228 | 0.0077% |
|  | Cfu-Sat31-1460 | 1460 | 0.0071% |
|  | Cfu-Sat32-930 | 930 | 0.0061% |
|  | Cfu-Sat33-949 | 949 | 0.0060% |
|  | Cfu-Sat34-39 | 39 | 0.0059% |
|  | Cfu-Sat35-916 | 916 | 0.0059% |
| ***C. dussumieri*** | Cdu-Sat1-220 | 220 | 0.1386% |
|  | Cdu-Sat3-277 | 277 | 0.0164% |
| ***C. dussumieri*** | Cdu-Sat4-1277 | 1277 | 0.0067% |
|  | Cdu-Sat5-15 | 15 | 0.0065% |
|  | Cdu-Sat6-2585 | 2585 | 0.0063% |
