# Supplementary figures and images for: Tracing the rhythms of repetitive sequences: Mixed modes of satellite DNA and transposable element evolution in the air-breathing catfish (Clarias)
Source: Research Square preprint supplement (doi:10.21203/rs.3.rs-8297195/v1), 2025-12-19

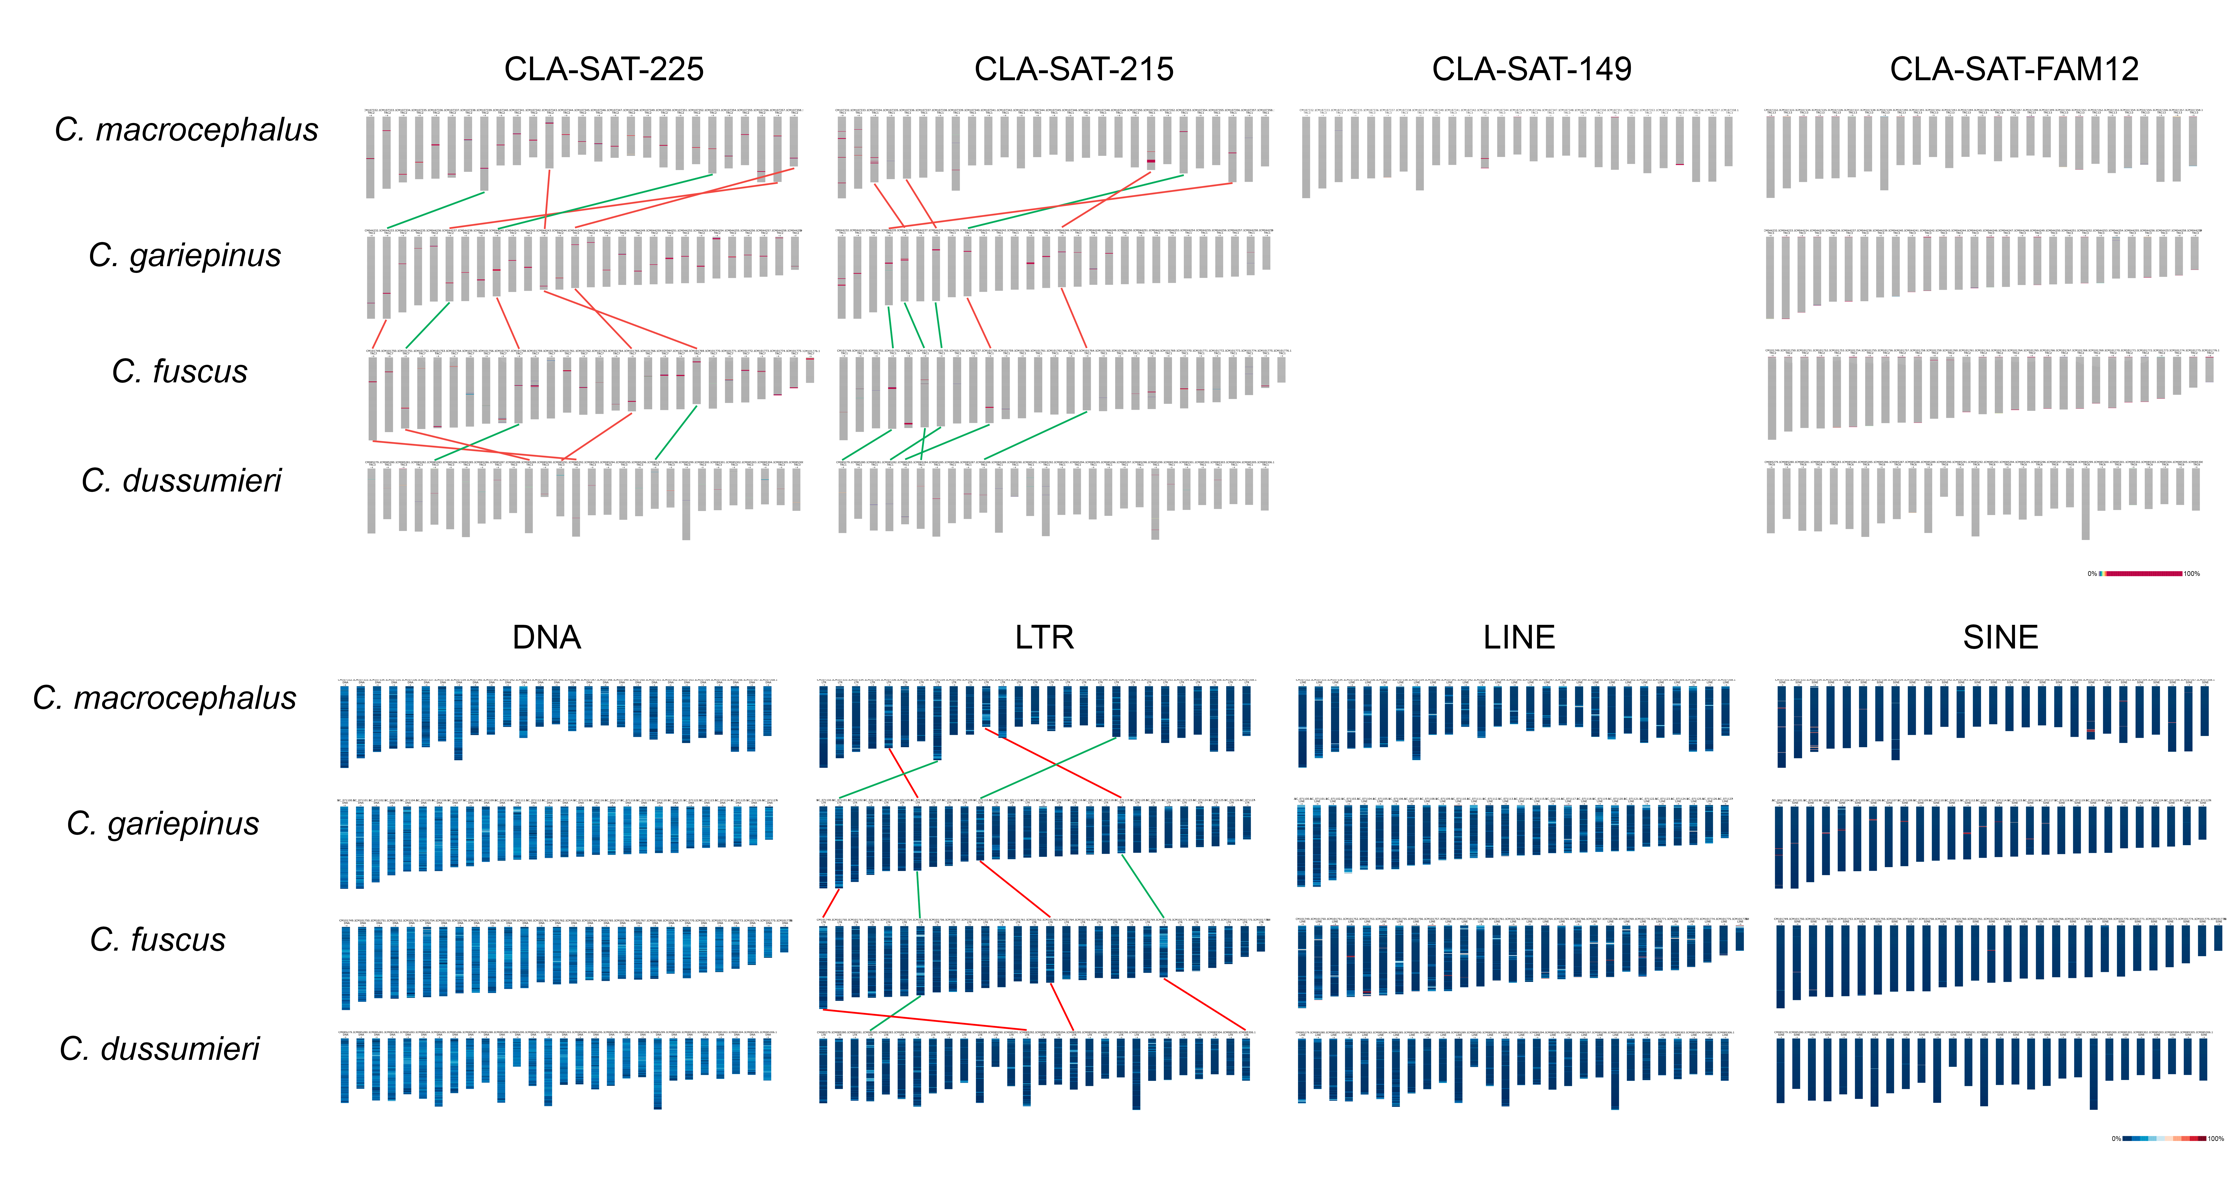


Supplementary Figure 1. Lisachov et al.


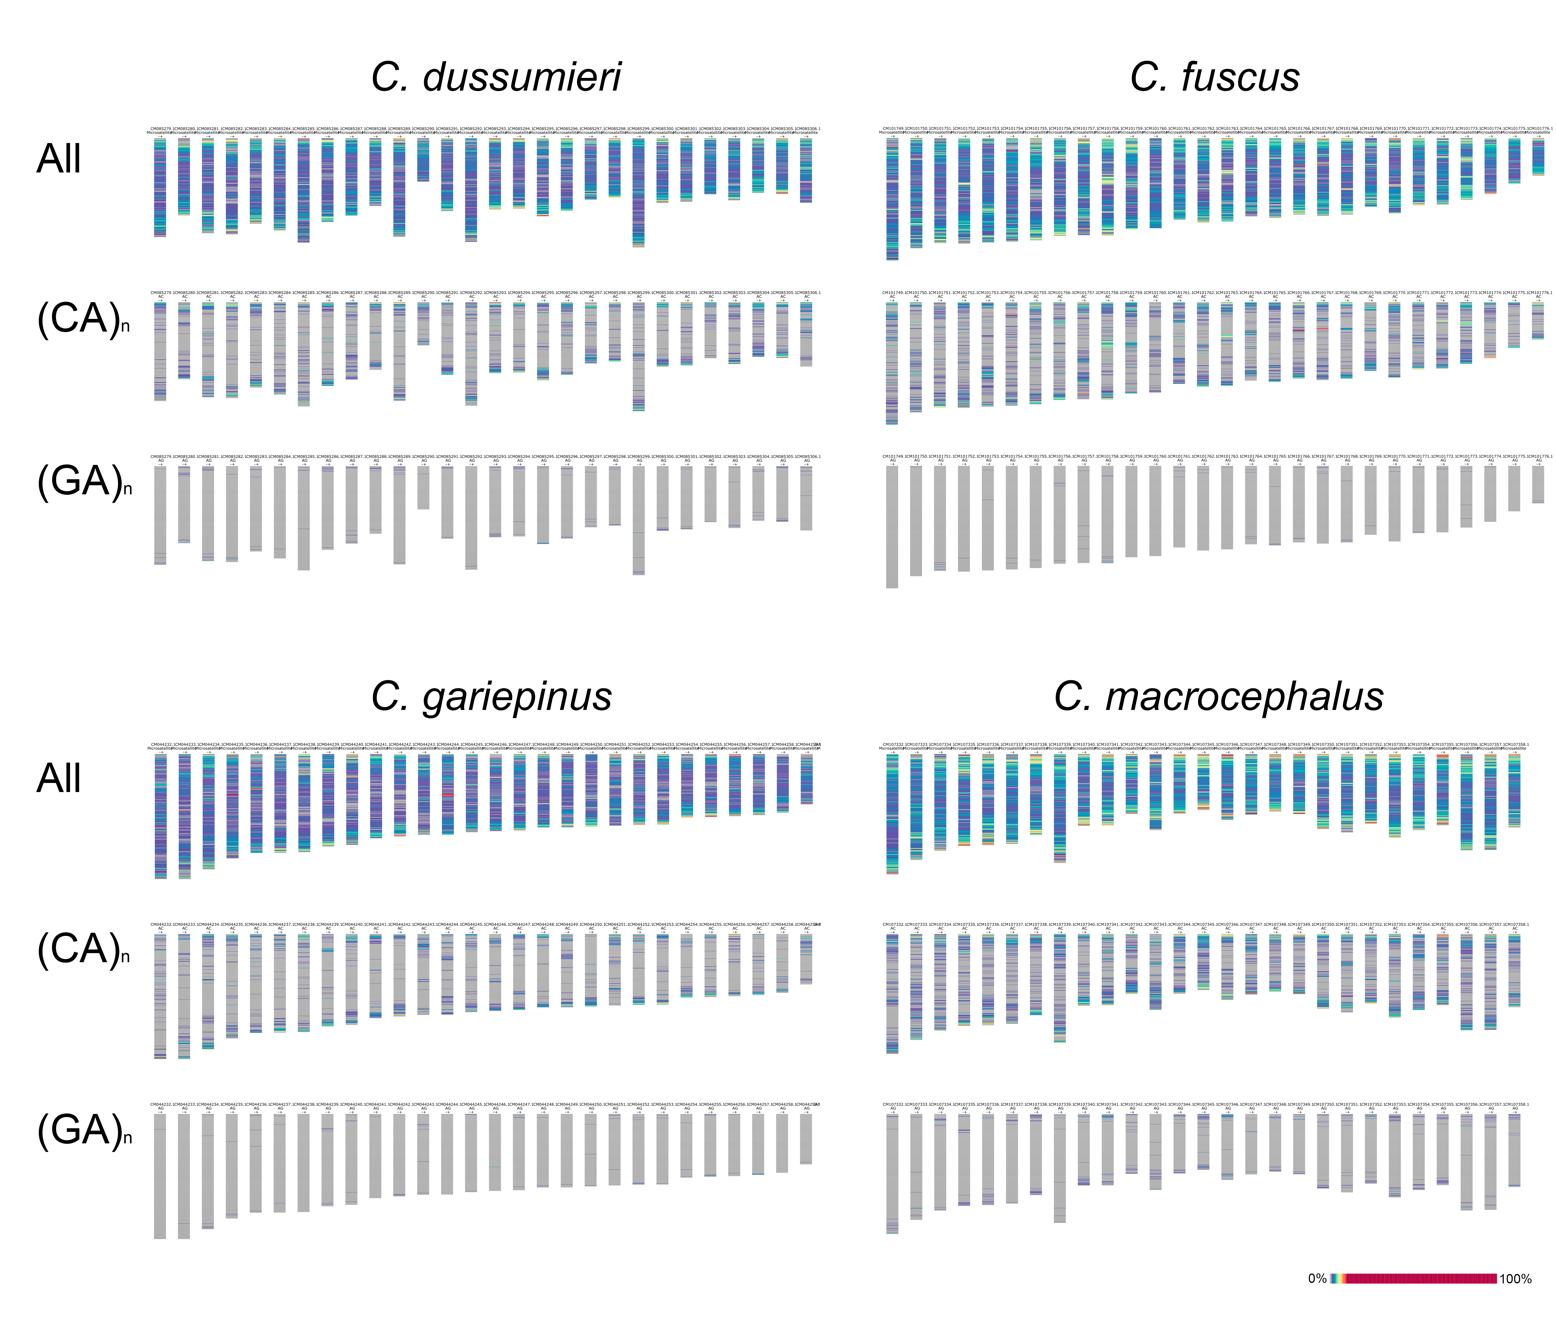


Supplementary Figure 2. Lisachov et al.

Supplement: Supplementary file 1 [file 42f4101e260d20df6e97a05a.docx]
